# Supplementary material for: Discharge time from healthcare facilities after birth in Tanzania : A secondary analysis of Demographic and Health Surveys from 2015-16 and 2022
Source: Research Square preprint supplement (doi:10.21203/rs.3.rs-7141902/v1), 2025-08-19

**Table S1 – Definition of variables included in the study**

| Outcome / indicator                                                         | Question code | Variable code in individual recode dataset | Variable used in analysis                                                                                                                                                                                                                                                                        |
|-----------------------------------------------------------------------------|---------------|--------------------------------------------|--------------------------------------------------------------------------------------------------------------------------------------------------------------------------------------------------------------------------------------------------------------------------------------------------|
| Length-of-stay (LoS) after most-recent facility-based livebirth             | Q431          | m61_1                                      | <u>Continuous</u> – converted to hours based on Campbell et al 2016                                                                                                                                                                                                                              |
| Early discharge – cut-offs according to WHO and Tanzania Ministry of Health | Q431          | m61_1                                      | <u>Categorical – 2 categories</u><br>Coded from continuous LoS variable:<br>1= Early discharge (Yes) when LoS<24 hours after vaginal birth or LoS<72 hours after caesarean section<br><br>0 = Recommended LoS (No) when LoS≥24 hours after vaginal birth or LoS≥72 hours after caesarean section |

| Variable                                                                                | Question code          | Variable code in IR dataset | Variable as used in analysis                                                                                                                                                    | DHS 2015-16 | DHS 2022 |
|-----------------------------------------------------------------------------------------|------------------------|-----------------------------|---------------------------------------------------------------------------------------------------------------------------------------------------------------------------------|-------------|----------|
| Zone                                                                                    |                        | sreg1                       | <u>Categorical – 9 categories</u><br>Western, Northern, Central, Southern highlands, Southern, South west highlands, Lake, Eastern and Zanzibar                                 | x           | x        |
| Residence                                                                               |                        | v025                        | <u>Categorical – 2 categories</u><br>0= Rural<br>1= Urban                                                                                                                       | x           | x        |
| Union and cohabiting status (at time of survey)                                         | Q701, Q704, Q703, Q704 | v502 and v504               | <u>Categorical – 2 categories</u><br>0= Not in union/not living with partner<br>1= In union and living with partner                                                             | x           | x        |
| Facility level                                                                          | Q430                   | m15_1                       | <u>Categorical – 3 categories</u><br>0= Hospital<br>1= Health centre<br>2= Dispensary/clinic                                                                                    | x           | x        |
| Facility ownership                                                                      | Q430                   | m15_1                       | <u>Categorical – 2 categories</u><br>0= Governmental<br>1= Non-governmental                                                                                                     | x           | x        |
| Day of birth                                                                            | Q215                   | b17_01, b1_01, b2_01        | <u>Categorical – 2 categories</u><br>0= Weekend (Saturday, Sunday)<br>1= Weekday (Monday-Friday)<br>Days of the week generated from day of birth using 'dow' function in Stata. | x           | x        |
| Shared bed during stay                                                                  | Q446A.a                | mh18a_1                     | <u>Categorical – 2 categories</u><br>0 = No<br>1= Yes                                                                                                                           |             | x        |
| Spent time without a mattress on the floor                                              | Q446A.b                | mh18b_1                     | <u>Categorical – 2 categories</u><br>0 = No<br>1= Yes                                                                                                                           |             | x        |
| Was denied care because could not pay                                                   | Q446B                  | mh19_1                      | <u>Categorical – 2 categories</u><br>0 = No<br>1= Yes                                                                                                                           |             | x        |
| Was delayed in leaving the facility because could not pay                               | Q446C                  | mh20_1                      | <u>Categorical – 2 categories</u><br>0 = No<br>1= Yes                                                                                                                           |             | x        |
| Access to toilet                                                                        | Q446F-G                | mh23_1 & mh24_1             | <u>Categorical – 2 categories</u><br>0 = No<br>1= Yes                                                                                                                           |             | x        |
| Maternal age at index childbirth [newborn's date of birth – respondent's date of birth] |                        | b3_01 – v011                | <u>Categorical – 5 categories</u><br>0= <19 years<br>1= 20-24 years<br>2= 25-29 years<br>3= 30-34 years<br>4= 35+ years                                                         | x           | x        |
| Highest completed education level                                                       | Q107-Q108              | v106                        | <u>Categorical – 3 categories</u><br>1= No formal education<br>2= Primary education<br>3= Secondary education or higher                                                         | x           | x        |
| Household wealth index for urban / rural                                                |                        | v190a                       | <u>Categorical – 5 categories</u><br>0= Poorest ; 1= Poorer<br>2= Middle ; 3= Richer ; 4= Richest                                                                               | x           | x        |
| Parity at index birth                                                                   | Birth history          | b0_01-b0_20                 | Categorical – 3 categories – # pregnancies (multiple pregnancies counted as 1)<br>1= Primiparous<br>2= Multiparous 2-4<br>3= Grand multiparous 5+                               | x           | x        |

| Variable                                    | Question code  | Variable code in IR dataset | Variable as used in analysis                                                                                                                                                                 | DHS 2015-16 | DHS 2022 |
|---------------------------------------------|----------------|-----------------------------|----------------------------------------------------------------------------------------------------------------------------------------------------------------------------------------------|-------------|----------|
| Number of ANC visits during index pregnancy | Q408<br>Q412   | m14_1                       | <u>Categorical – 3 categories</u><br>0= None<br>1= 1-3 visits<br>2= 4 or more visits                                                                                                         | x           | x        |
| Mode of birth                               | Q432           | m17_1                       | <u>Categorical – 2 categories</u><br>0= Vaginal birth<br>1= Birth by caesarean section                                                                                                       | x           | x        |
| Multiple births                             | Q214           | b0_01                       | <u>Categorical – 2 categories</u><br>0= Single birth<br>1= Multiple birth                                                                                                                    | x           | x        |
| Ever had a terminated pregnancy             | Q206 /<br>Q230 | v228                        | <u>Categorical – 2 categories</u><br>0= Never had a terminated pregnancy<br>1= Ever had a terminated pregnancy                                                                               | x           | x        |
| Newborn sex                                 | Q213           | b4_01                       | <u>Categorical – 2 categories</u><br>0= Boy<br>1= Girl                                                                                                                                       | x           | x        |
| Newborn underweight status at birth         | Q428           | m19_1                       | <u>Categorical – 2 categories</u><br>0 = not underweight (weight >=2500g)<br>1= underweight (weight < 2500)<br><br>n=247 missing values                                                      | x           | x        |
| Newborn survival and time of death          |                | b5_01, b6_01,<br>m61_1      | <u>Categorical – 3 categories</u><br>0= Survived until survey<br>1= Died on/before day of discharge<br>2= Died after discharge<br><br>Recoded following the guidance in Campbell et al 2016. | x           | x        |

Table S2 – Characteristics of women (15-49 years) who had their most recent livebirth in a healthcare facility with missing/unknown values for length-of-stay in the three years preceding the DHS survey.

| Characteristics                                         |                                                                | 2015-16 (n=3) | 2022 (n=36) |
|---------------------------------------------------------|----------------------------------------------------------------|---------------|-------------|
| Socio-demographic and economic factors                  | <b>Zone</b>                                                    |               |             |
|                                                         | Western                                                        | 0             | 1 (3.7%)    |
|                                                         | Northern                                                       | 0             | 1 (2.4%)    |
|                                                         | Central                                                        | 0             | 2 (6.4%)    |
|                                                         | South west highlands                                           | 1 (22.7%)     | 10 (16.3%)  |
|                                                         | Lake                                                           | 1 (66.5%)     | 19 (51.9%)  |
|                                                         | Eastern                                                        | 0             | 3 (19.2%)   |
|                                                         | Zanzibar                                                       | 1 (10.8%)     | 0           |
|                                                         | <b>Residence</b>                                               |               |             |
|                                                         | Rural                                                          | 3 (100%)      | 27 (72%)    |
|                                                         | Urban                                                          | 0             | 9 (28%)     |
| Facility characteristics and perception of care quality | <b>Union and cohabiting status at time of survey</b>           |               |             |
|                                                         | Not in union/not living with a partner                         | 1 (66.5%)     | 6 (12.9%)   |
|                                                         | Living with a partner                                          | 2 (33.5%)     | 30 (87.1%)  |
|                                                         | <b>Maternal age at index childbirth</b>                        |               |             |
|                                                         | 13-19 years                                                    | 2 (89.2%)     | 4 (7.0%)    |
|                                                         | 20-24 years                                                    | 0             | 11 (28.1%)  |
|                                                         | 25-29 years                                                    | 1 (10.8%)     | 9 (24.4%)   |
|                                                         | 30-34 years                                                    | 0             | 6 (24.6%)   |
|                                                         | 35-49 years                                                    | 0             | 6 (15.8%)   |
|                                                         | <b>Highest completed education level</b>                       |               |             |
|                                                         | No formal education                                            | 2 (89.2%)     | 13 (31.3%)  |
|                                                         | Primary education                                              | 1 (10.8%)     | 15 (42.9%)  |
|                                                         | Secondary or higher                                            | 0             | 8 (25.8%)   |
| Women's needs and obstetric history                     | <b>Household wealth index</b>                                  |               |             |
|                                                         | Poorest                                                        | 0             | 15 (37.8%)  |
|                                                         | Poorer                                                         | 1 (22.7%)     | 12 (24.4%)  |
|                                                         | Middle                                                         | 0             | 3 (12.1%)   |
|                                                         | Richer                                                         | 1 (66.5%)     | 3 (10.3%)   |
|                                                         | Richest                                                        | 1 (10.8%)     | 3 (15.3%)   |
|                                                         | <b>Facility level</b>                                          |               |             |
|                                                         | Dispensary/clinic                                              | 1 (22.7%)     | 17 (41.6%)  |
|                                                         | Health center                                                  | 0             | 11 (29.9%)  |
|                                                         | Hospital                                                       | 2 (77.3%)     | 8 (28.5%)   |
| Newborn characteristics                                 | <b>Facility ownership</b>                                      |               |             |
|                                                         | Governmental                                                   | 3 (100%)      | 36 (100%)   |
|                                                         | <b>Day of birth</b>                                            |               |             |
|                                                         | Weekend                                                        | 0             | 12 (33.2%)  |
|                                                         | Weekday                                                        | 3 (100%)      | 24 (66.8%)  |
|                                                         | <b>Shared bed during stay</b>                                  | N/A           | 1 (2.4%)    |
|                                                         | <b>Spent time without a mattress on the floor</b>              | N/A           | 1 (2.8%)    |
|                                                         | <b>Was denied care because could not pay</b>                   | N/A           | 0           |
|                                                         | <b>Was delayed to leave the facility because could not pay</b> | N/A           | 0           |
|                                                         | <b>Access to toilet</b>                                        | N/A           | 30 (86.9%)  |
| Newborn characteristics                                 | <b>Mode of birth</b>                                           |               |             |
|                                                         | Vaginal                                                        | 3 (100%)      | 33 (91.2%)  |
|                                                         | Caesarean section                                              | 0             | 3 (8.8%)    |
|                                                         | <b>Parity at index birth</b>                                   |               |             |
|                                                         | Primiparous                                                    | 3 (100%)      | 9 (21%)     |
|                                                         | Multiparous 2-4                                                | 0             | 17 (49.3%)  |
|                                                         | Multiparous 5+                                                 | 0             | 10 (29.7%)  |
|                                                         | <b>Number of ANC visits during index pregnancy</b>             |               |             |
|                                                         | None                                                           | 0             | 21 (56.3%)  |
|                                                         | 1-3 visits                                                     | 2 (89.2%)     | 3 (8.2%)    |
|                                                         | 4 or more visits                                               | 1 (10.8%)     | 12 (35.4%)  |
| Newborn characteristics                                 | <b>Multiple birth</b>                                          | 3 (100%)      | 0           |
|                                                         | <b>Ever had a terminated pregnancy</b>                         | 2 (33.5%)     | 0           |
|                                                         | <b>Newborn sex</b>                                             |               |             |
|                                                         | Boy                                                            | 3 (100%)      | 17 (48.8%)  |
|                                                         | Girl                                                           | 0             | 19 (51.2%)  |
|                                                         | <b>Newborn underweight status at birth<sup>§</sup></b>         |               |             |
|                                                         | Underweight <2500g                                             | 0             | 1 (3%)      |
|                                                         | Not underweight ≥2500g                                         | 3 (100%)      | 28 (97%)    |
|                                                         | <b>Newborn survival</b>                                        |               |             |
|                                                         | Survived until survey                                          | 3 (100%)      | 36 (100%)   |
| <b>Total</b>                                            |                                                                | 3 (100%)      | 36 (100%)   |

<sup>§</sup>n=7 missing values for newborn's weight at birth in 2022

**Table S3 - Multivariable logistic regression of factors and early discharge among women who had their most recent birth (vaginal and cesarean section) in a healthcare facility in the three years preceding the DHS 2022, excluding variables with missing values**

|                                            |                                                                | Vaginal births (n=3,994) |         | Cesarean section (n=624) |         |
|--------------------------------------------|----------------------------------------------------------------|--------------------------|---------|--------------------------|---------|
| Characteristics                            |                                                                | aOR (95%CI)              | p-value | aOR (95%CI)              | p-value |
| Socio-demographic and economic factors     | <b>Zone<sup>†</sup></b>                                        |                          |         |                          |         |
|                                            | Western                                                        | 0.6 [0.4;1.0]            | 0.065   | 0.8 [0.3;2.6]            | 0.749   |
|                                            | Northern                                                       | 1.2 [0.8;1.9]            | 0.423   | 0.7 [0.3;1.5]            | 0.357   |
|                                            | Central                                                        | 0.8 [0.5;1.2]            | 0.288   | 1.4 [0.6;3.5]            | 0.470   |
|                                            | Southern highlands                                             | 0.5 [0.3;0.9]            | 0.014   | 0.5 [0.2;1.1]            | 0.071   |
|                                            | Southern                                                       | 0.9 [0.6;1.6]            | 0.825   | 0.8 [0.2;2.5]            | 0.667   |
|                                            | South west highlands                                           | 1.9 [1.3;2.9]            | 0.002   | 0.8 [0.3;1.8]            | 0.568   |
|                                            | Lake                                                           | 0.7 [0.5;1.0]            | 0.080   | 1.3 [0.5;3.3]            | 0.560   |
|                                            | Eastern                                                        | ref                      |         | ref                      |         |
|                                            | Zanzibar                                                       | 6.4 [4.1;9.9]            | <0.001  | 1.6 [0.6;4.5]            | 0.330   |
|                                            | <b>Residence</b>                                               |                          |         |                          |         |
|                                            | Rural                                                          | ref                      |         | ref                      |         |
|                                            | Urban                                                          | 1.0 [0.8;1.3]            | 0.934   | 1.6 [1.0;2.6]            | 0.070   |
|                                            | <b>Union and cohabiting status at time of survey</b>           |                          |         |                          |         |
|                                            | Not in union/not living with a partner                         | ref                      |         |                          |         |
|                                            | Living with a partner                                          | 1.1 [0.9;1.4]            | 0.211   |                          |         |
|                                            | <b>Maternal age at index childbirth</b>                        |                          |         |                          |         |
|                                            | 13-19 years                                                    | 0.9 [0.7;1.4]            | 0.770   |                          |         |
|                                            | 20-24 years                                                    | ref                      |         |                          |         |
|                                            | 25-29 years                                                    | 1.1 [0.8;1.4]            | 0.687   |                          |         |
|                                            | 30-34 years                                                    | 1.2 [0.9;1.6]            | 0.301   |                          |         |
|                                            | 35-49 years                                                    | 1.1 [0.8;1.6]            | 0.600   |                          |         |
|                                            | <b>Highest completed education level<sup>^</sup></b>           |                          |         |                          |         |
|                                            | No formal education                                            | 1.0 [0.7;1.2]            | 0.771   | 0.3 [0.1;0.8]            | 0.023   |
|                                            | Primary education                                              | ref                      |         | ref                      |         |
|                                            | Secondary or higher                                            | 0.9 [0.7;1.2]            | 0.596   | 1.0 [0.6;1.7]            | 0.901   |
|                                            | <b>Household wealth index</b>                                  |                          |         |                          |         |
|                                            | Poorest                                                        | 1.0 [0.8;1.4]            | 0.846   | 0.4 [0.1;1.2]            | 0.114   |
|                                            | Poorer                                                         | 0.8 [0.6;1.1]            | 0.156   | 1.0 [0.4;2.1]            | 0.946   |
|                                            | Middle                                                         | ref                      |         | ref                      |         |
|                                            | Richer                                                         | 0.9 [0.7;1.2]            | 0.406   | 1.3 [0.7;2.6]            | 0.389   |
|                                            | Richest                                                        | 0.8 [0.6;1.2]            | 0.364   | 1.3 [0.6;2.7]            | 0.478   |
| Facility characteristics and perception of | <b>Facility level<sup>†</sup></b>                              |                          |         |                          |         |
|                                            | Dispensary/clinic                                              | 3.6 [2.6;5.0]            | <0.001  | --                       | --      |
|                                            | Health center                                                  | 1.5 [1.1;2.0]            | 0.008   | 3.2 [2.0;5.4]            | <0.001  |
|                                            | Hospital                                                       | ref                      |         | ref                      |         |
|                                            | <b>Facility Ownership</b>                                      |                          |         |                          |         |
|                                            | Governmental                                                   | ref                      |         | ref                      |         |
|                                            | Non-governmental                                               | 0.8 [0.5;1.3]            | 0.394   | 0.7 [0.4;1.4]            | 0.303   |
| Women's needs and obstetric history        | <b>Parity at index birth</b>                                   |                          |         |                          |         |
|                                            | Primiparous                                                    | ref                      |         |                          |         |
|                                            | Multiparous 2-4                                                | 1.0 [0.7;1.3]            | 0.769   |                          |         |
|                                            | Multiparous 5+                                                 | 1.1 [0.7;1.5]            | 0.706   |                          |         |
|                                            | <b>Number of ANC visits during index pregnancy<sup>†</sup></b> |                          |         |                          |         |
|                                            | None                                                           | 0.7 [0.5;1.0]            | 0.041   |                          |         |
|                                            | 1-3 visits                                                     | 1.0 [0.8;1.2]            | 0.932   |                          |         |
|                                            | 4 or more visits                                               | ref                      |         |                          |         |
| Newborn characteristics                    | <b>Newborn survival</b>                                        |                          |         |                          |         |
|                                            | Survived until survey                                          | ref                      |         |                          |         |
|                                            | Died on/before discharge                                       | 0.6 [0.2;1.7]            | 0.302   |                          |         |
|                                            | Died after discharge                                           | 0.6 [0.3;1.6]            | 0.318   |                          |         |

**Table S4 – Length of stay and early discharge by mode of birth and survey year**

|                     |                                   | <b>Length-of-stay (hours)</b> |            | <b>Early discharge</b> |              |
|---------------------|-----------------------------------|-------------------------------|------------|------------------------|--------------|
|                     |                                   | <b>Median</b>                 | <b>IQR</b> | <b>n (%)</b>           | <b>95%CI</b> |
| <b>2015<br/>-16</b> | <b>Vaginal birth</b>              | 16                            | [6;36]     | 1890 (54.8%)           | [52.4; 57.2] |
|                     | <b>Birth by Caesarean section</b> | 84                            | [84;204]   | 47 (17.2%)             | [11.3; 25.3] |
|                     | <b>Total</b>                      | 24                            | [8;36]     | 1937 (51%)             | [48.7; 53.3] |
| <b>2022</b>         | <b>Vaginal birth</b>              | 24                            | [12;36]    | 1386 (30.3%)           | [28.2; 32.5] |
|                     | <b>Birth by Caesarean section</b> | 84                            | [60;108]   | 161 (25.2%)            | [21.3; 29.5] |
|                     | <b>Total</b>                      | 36                            | [16;60]    | 1547 (29.6%)           | [27.7; 31.6] |

Figure S1 - Histograms of length of stay distribution by mode of birth for women who had a livebirth in the three years preceding the survey in Tanzania in 2015-16 and 2022

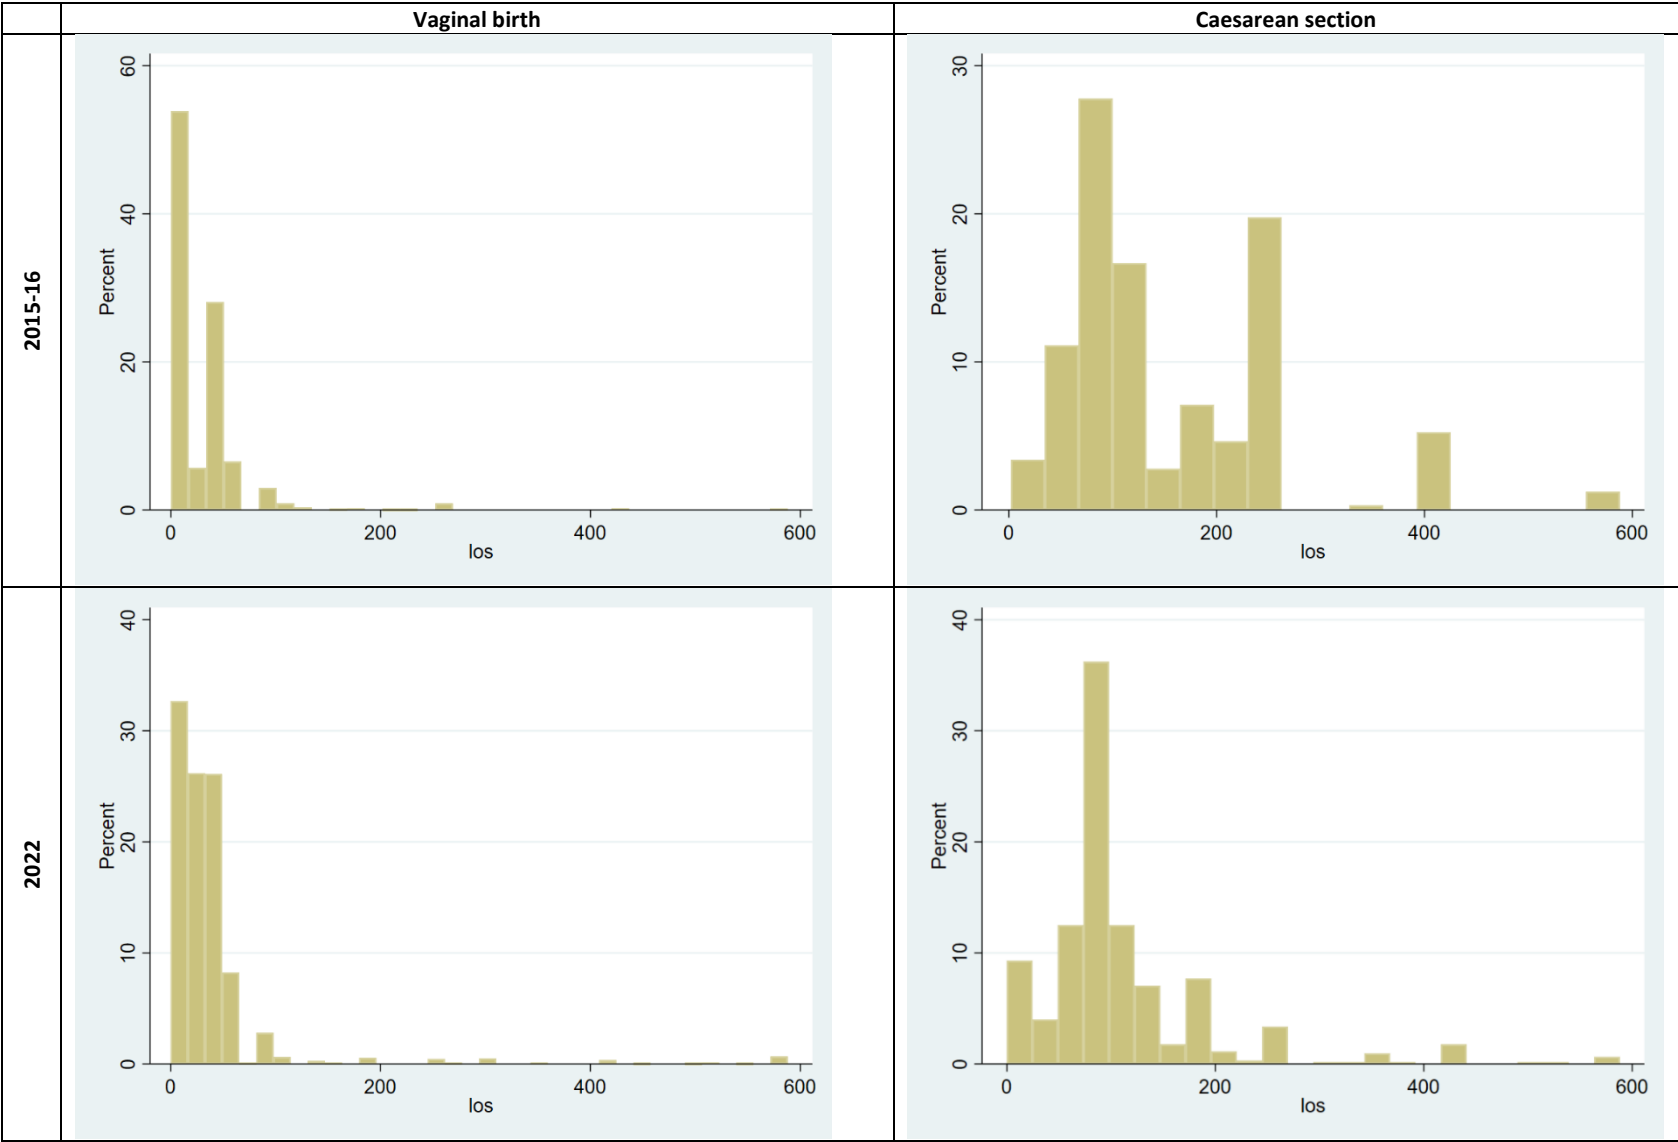

Supplement: Supplementary file [file 72a2c12a5e51993dec9dda95.pdf]
